# Supplementary material
Source: MDPI journal article supplement (https://www.mdpi.com/2073-4433/14/9/1351)
Supplement: s1 [file s1]

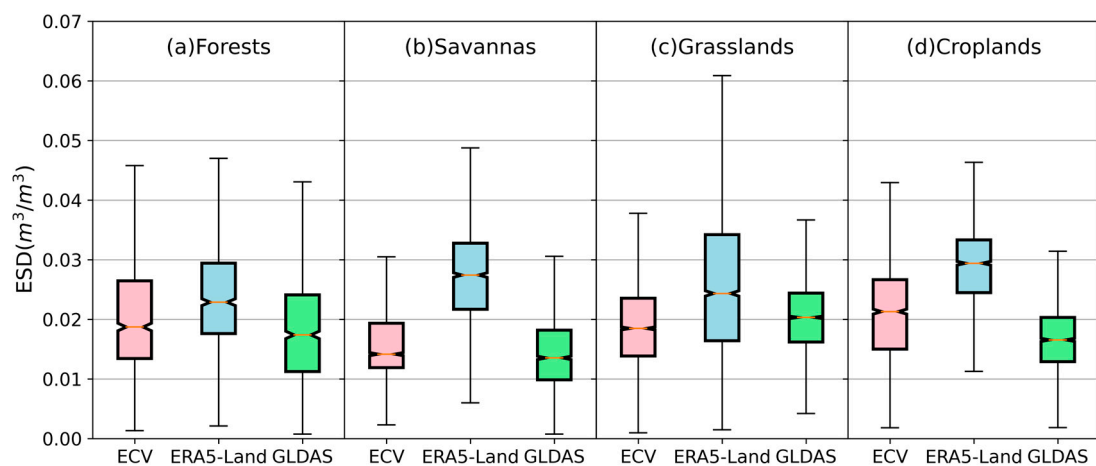

**Figure S1.** Box plot of ESD at 0.25° based on ETC analysis on four land cover types

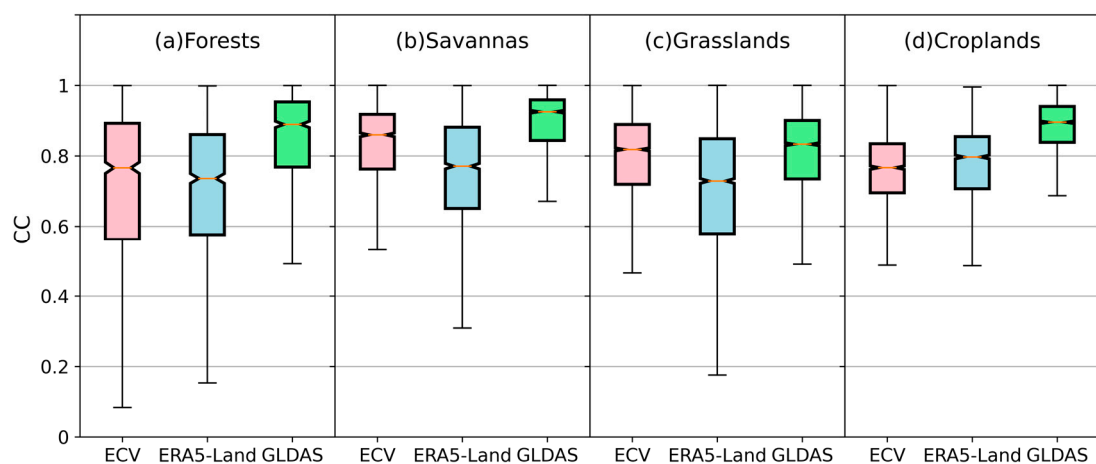

**Figure S2.** Box plot of CC at 0.25° based on ETC analysis on four land cover types

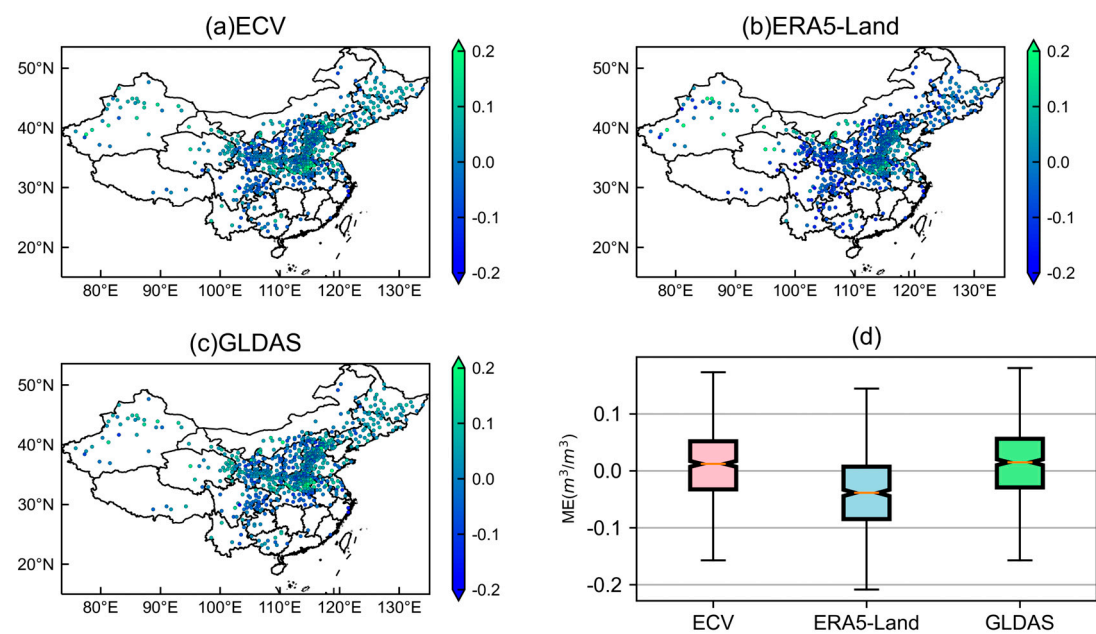

**Figure S3.** Spatial distribution of (a) ECV, (b) ERA5-Land, (c) GLDAS and box plot (d) of ME verified in-situ observations on 0.25°

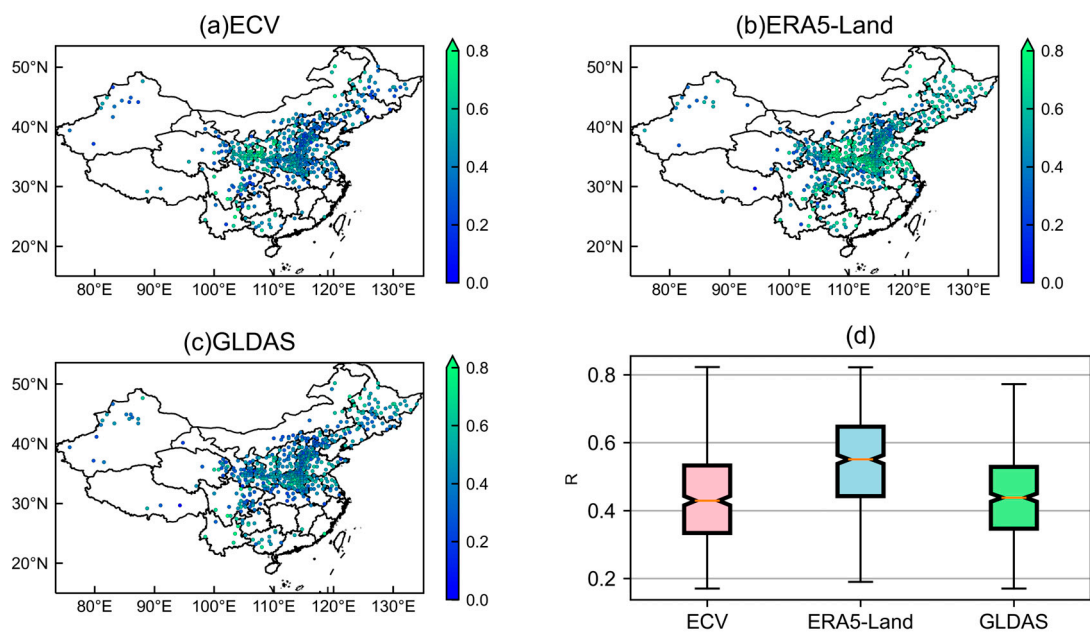

**Figure S4.** Spatial distribution of (a) ECV, (b) ERA5-Land, (c) GLDAS and box plot (d) of R verified in-situ observations on 0.25°

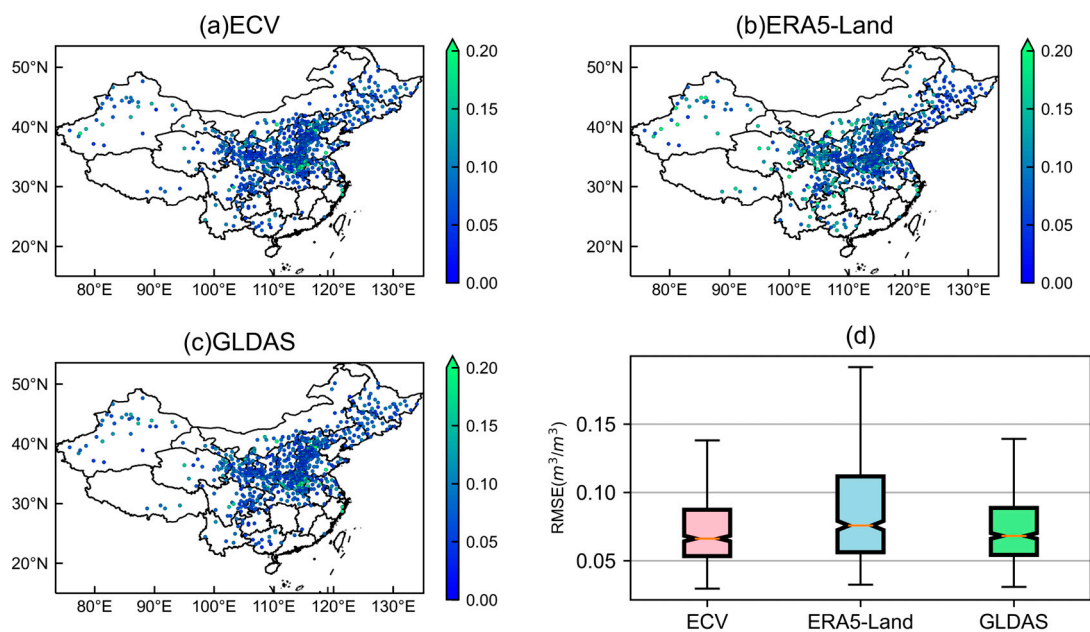

**Figure S5.** Spatial distribution of (a) ECV, (b) ERA5-Land, (c) GLDAS and box plot (d) of RMSE verified in-situ observations on 0.25°

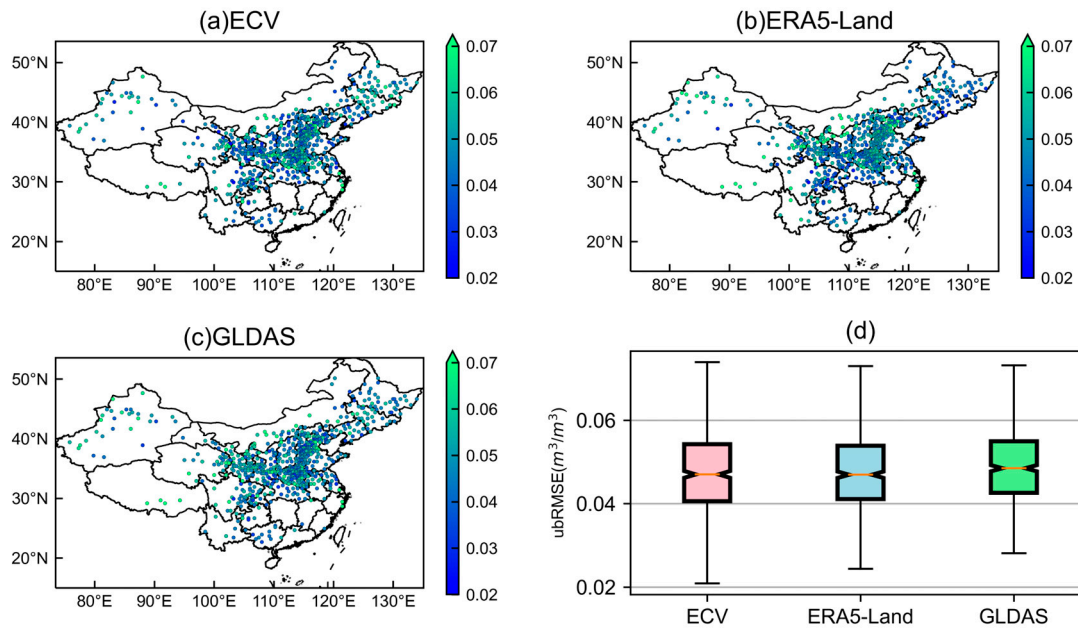

**Figure S6.** Spatial distribution of (a) ECV, (b) ERA5-Land, (c) GLDAS and box plot (d) of ubRMSE verified in-situ observations on  $0.25^\circ$

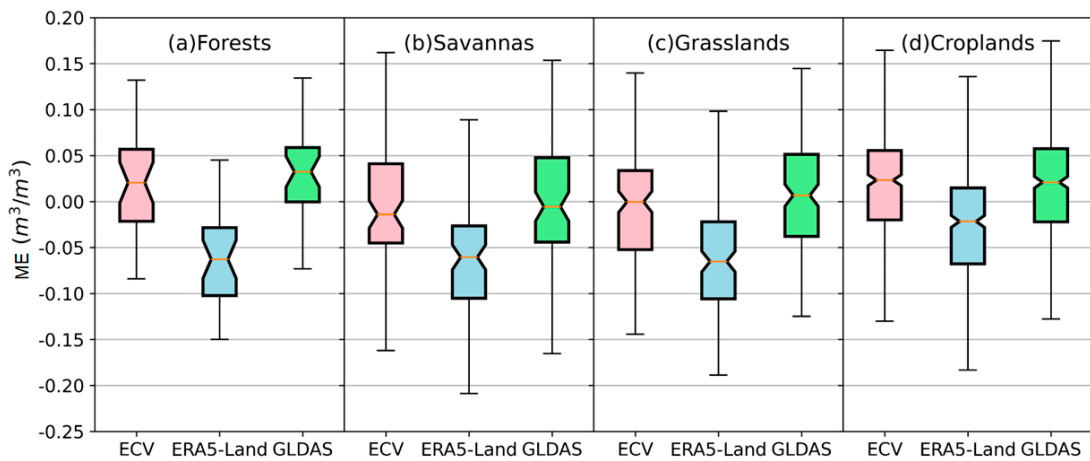

**Figure S7.** Box plots of ME against in-situ observations on different land cover types on  $0.25^\circ$

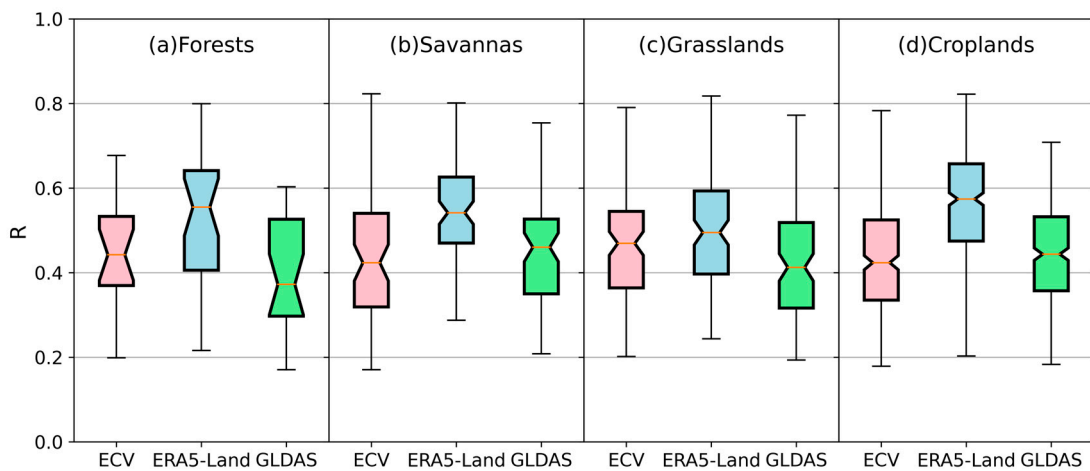

**Figure S8.** Box plots of R against in-situ observations on different land cover types on 0.25°

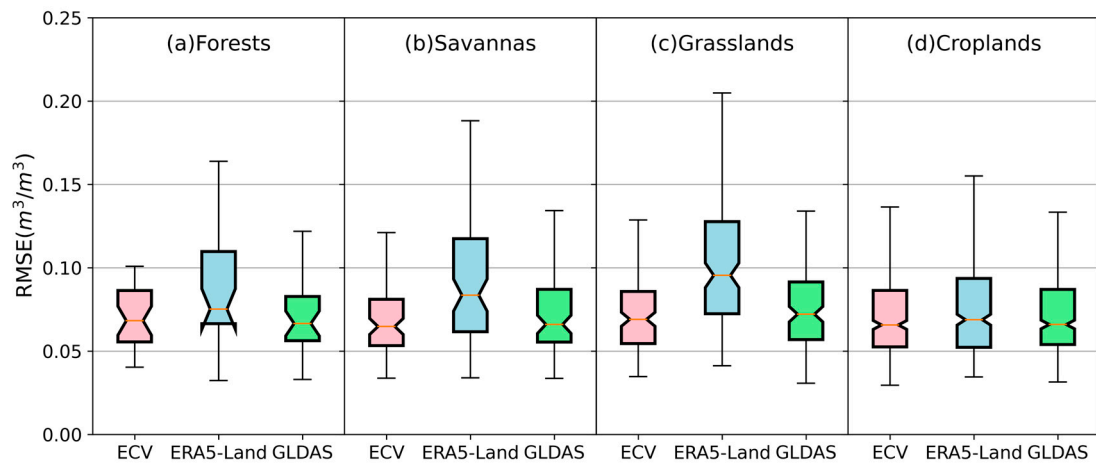

**Figure S9.** Box plots of RMSE against in-situ observations on different land cover types on 0.25°

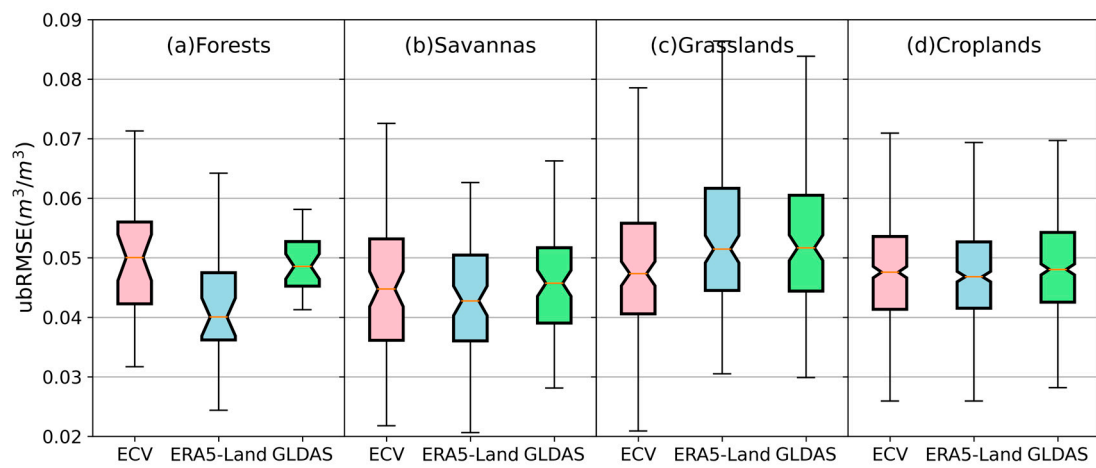

**Figure S10.** Box plots of ubRMSE against in-situ observations on different land cover types on 0.25°
